# Supplementary material
Source: PubMed Central journal article supplement (PMC3197992)
Supplement: supp_amiajnl-2011-000121_JAMIA_Appendix_000121.pdf [file supp_amiajnl-2011-000121_JAMIA_Appendix_000121.pdf]

## ADHD

Rule 0:

- Code or free-text problem on problem list

Rule 1:

- 2 or more billing codes in 314.0, 314.00 or 314.01 (ADHD)

Rule 2:

- 1 or more billing codes in 314.0, 314.00 or 314.01 (ADHD)
- At least one medication in:
  - Attention Deficit-Hyperactivity Disorder (ADHD) Therapy, NRI-Type
  - Attention Deficit-Hyperactivity Disorder (ADHD) Therapy, Stimulant-Type

## Asthma/COPD

Rule 0:

- Code or free-text problem on problem list

Rule 1:

- 2 or more billing codes in 491, 491.0, 491.1, 491.2, 491.20, 491.21, 491.22, 491.8, 491.9, 492, 492.0, 492.8, 493, 493.0, 493.00, 493.01, 493.02, 493.1, 493.10, 493.11, 493.12, 493.2, 493.20, 493.21, 493.22, 493.8, 493.81, 493.82, 493.9, 493.90, 493.92, 495.2, 496 (Asthma and COPD)

Rule 2:

- 1 or more billing codes in 491, 491.0, 491.1, 491.2, 491.20, 491.21, 491.22, 491.8, 491.9, 492, 492.0, 492.8, 493, 493.0, 493.00, 493.01, 493.02, 493.1, 493.10, 493.11, 493.12, 493.2, 493.20, 493.21, 493.22, 493.8, 493.81, 493.82, 493.9, 493.90, 493.92, 495.2, 496 (Asthma and COPD)
- At least one medication in:
  - Asthma Therapy – Anticholinergic
  - Asthma Therapy - Mast Cell Stabilizers
  - Asthma Therapy – Sympathomimetics
  - Asthma Therapy - Beta Adrenergic Agents
  - Asthma Therapy – Alpha/Beta Adrenergic Agent Combinations
  - Asthma Therapy – Xanthines
  - Asthma Therapy – Glucocorticoids
  - Asthma Therapy – Leukotriene Modulators
  - Asthma Therapy Combinations
  - Asthma Therapy - Monoclonal Antibodies to Immunoglobulin E (IgE)

## Breast Cancer

Rule 0:

- Code or free-text problem on problem list

Rule 1:

- 2 or more billing codes in 174.0, 174.1, 174.2, 174.3, 174.4, 174.5, 174.6, 174.8, 174.9, 175.0, or 175.9 (Breast Cancer)

Rule 2:

- 1 or more billing codes in 174.0, 174.1, 174.2, 174.3, 174.4, 174.5, 174.6, 174.8, 174.9, 175.0, or 175.9 (Breast Cancer)
- At least one medication in:
  - Antineoplastic - Selective Estrogen Receptor Modulators (SERMs)
  - Selective Estrogen Receptor Modulators (SERMs)

Rule 3:

- At least one medication in:
  - Antineoplastic - Aromatase Inhibitors)

## CAD

Rule 0:

- Code or free-text problem on problem list

Rule 1:

- 3 or more billing codes in 414.0, 414.00, 414.01, 414.02, 414.03, 414.04, 414.05, 414.06, 414.07, 414.2, 414.3, 414.8, 414.9 (CAD)

Rule 2:

- 1 or more billing codes in 414.0, 414.00, 414.01, 414.02, 414.03, 414.04, 414.05, 414.06, 414.07, 414.2, 414.3, 414.8, 414.9 (CAD)
- At least one medication in
  - Platelet Aggregation Inhibitors - Thienopyridine Agents

Rule 3:

- At least one of the following procedures on the problem or procedure list:
  - Coronary artery bypass graft
  - Percutaneous transluminal coronary angioplasty
  - Placement of stent in coronary artery

### CHF

Rule 0:

- Code or free-text problem on problem list

Rule 1:

- 3 or more billing codes in 402.01, 402.11, 402.91, 404.01, 404.03, 404.11, 404.13, 404.91, 404.93, 428.0, 428.00, 428.01, 428.09, 428.1, 428.20, 428.21, 428.22, 428.23, 428.30, 428.31, 428.32, 428.33, 428.40, 428.41, 428.42, 428.43, 428.9, 425.0, 425.1, 425.3, 425.4, 425.5, 425.7, 425.9, 425.9 (CHF and cardiomyopathy)

Rule 2:

- 2 or more billing codes in 402.01, 402.11, 402.91, 404.01, 404.03, 404.11, 404.13, 404.91, 404.93, 428.0, 428.00, 428.01, 428.09, 428.1, 428.20, 428.21, 428.22, 428.23, 428.30, 428.31, 428.32, 428.33, 428.40, 428.41, 428.42, 428.43, 428.9, 425.0, 425.1, 425.3, 425.4, 425.5, 425.7, 425.9, 425.9 (CHF and cardiomyopathy)
- 2 or more medications in:
  - Digitalis Glycosides
  - Antianginal - Coronary Vasodilators (Nitrates)
  - Antianginal – Potassium Channel Agonists
  - Antianginal Agents Other
  - Anginal Therapy Combinations
  - Beta Adrenergic Blockers
  - Beta Blocker-Diuretic Combinations
  - Direct Acting Vasodilators
  - Vasodilator-Diuretic Combinations
  - Antianginal – Calcium-channel Blockers
  - Antianginal – Coronary Vasodilators (Nitrates) and Combinations
  - Diuretic – Loop and Combinations
  - Antihyperlipidemic HMG CoA Reduct Inhib & Calcium Channel Blocker Comb
  - Vasodilator Combinations
  - Antianginal – Heart Rate Reducing Agents, Selective
  - ACE Inhibitors and ACE Inhibitor Combinations
  - Angiotensin II Receptor Blocker (ARBs) Single Agent and ARB Combinations
  - Calcium Channel Blockers and Combinations

## Diabetes

Rule 0:

- Code or free-text problem on problem list

Rule 1:

- Any HbA1C result greater than or equal to 7

Rule 2:

- 2 or more billing codes in 250, 250.0, 250.00, 250.01, 250.02, 250.03, 250.1, 250.10, 250.11, 250.12, 250.13, 250.2, 250.20, 250.21, 250.22, 250.23, 250.3, 250.30, 250.31, 250.32, 250.33, 250.4, 250.40, 250.41, 250.42, 250.43, 250.5, 250.50, 250.51, 250.52, 250.53, 250.6, 250.60, 250.61, 250.62, 250.63, 250.7, 250.70, 250.71, 250.72, 250.73, 250.8, 250.80, 250.81, 250.82, 250.83, 250.9, 250.90, 250.91, 250.92, 250.93 (Diabetes)

Rule 3:

- At least one medication in:
  - Injectable Antidiabetic Agents
  - Oral Antidiabetic Agents

## Glaucoma

Rule 0:

- Code or free-text problem on problem list

Rule 1:

- 2 or more billing codes in 360.42, 365, 365.0, 365.00, 365.01, 365.02, 365.03, 365.04, 365.1, 365.10, 365.11, 365.12, 365.13, 365.14, 365.15, 365.2, 365.20, 365.21, 365.22, 365.23, 365.24, 365.3, 365.31, 365.32, 365.4, 365.41, 365.41, 365.42, 365.43, 365.44, 365.5, 365.51, 365.52, 365.59, 365.6, 365.60, 365.61, 365.62, 365.63, 365.64, 365.65, 365.8, 365.81, 365.82, 365.83, 365.89, 365.9, V80.1 (Glaucoma)

Rule 2:

- At least one medication with ophthalmic route in:
  - Ophthalmic – Intraocular Pressure Reducing Agents

## Hemophilia

Rule 0:

- Code or free-text problem on problem list

Rule 1:

- 2 or more billing codes in 286.0, 286.1, 286.2, 286.3, 286.4 (Hemophilia)

## Hypertension

Rule 0:

- Code or free-text problem on problem list

Rule 1:

- Blood pressure equal to or greater than 140/95 on 3 or more separate days.

Rule 2:

- 3 or more billing codes in 401, 401.0, 401.1, 401.9, 402, 402.0, 402.00, 402.01, 402.1, 402.10, 402.11, 402.9, 402.90, 402.91, 403, 403.0, 403.00, 403.01, 403.1, 403.10, 403.11, 403.9, 403.90, 403.91, 404, 404.0, 404.00, 404.01, 404.02, 404.03, 404.1, 404.10, 404.12, 404.13, 404.9, 404.90, 404.91, 404.92, 404.93, 405, 405.0, 405.01, 405.09, 405.1, 405.11, 405.19, 405.9, 405.91, 405.99 (Hypertension)

Rule 3:

- Blood pressure equal to or greater than 140/95 ever.
- 2 or more of the following:
  - Beta Adrenergic Blockers

- Beta Blocker-Diuretic Combinations
- Central Alph-2 Agonists-Diuretic Combinations
- Diuretics
- Vasodilator-Diuretic Combinations
- Antihyperlipidemic HMG CoA Reduct Inhib & Calcium Channel Blocker Comb
- Renin-Angiotensin-Aldosterone System (RAAS) Blocking Agents
- Calcium Channel Blockers and Combinations

Rule 4:

- 1 or more billing code in 401, 401.0, 401.1, 401.9, 402, 402.0, 402.00, 402.01, 402.1, 402.10, 402.11, 402.9, 402.90, 402.91, 403, 403.0, 403.00, 403.01, 403.1, 403.10, 403.11, 403.9, 403.90, 403.91, 404, 404.0, 404.00, 404.01, 404.02, 404.03, 404.1, 404.10, 404.12, 404.13, 404.9, 404.90, 404.91, 404.92, 404.93, 405, 405.0, 405.01, 405.09, 405.1, 405.11, 405.19, 405.9, 405.91, 405.99 (Hypertension)
- 2 or more of the following:
  - Beta Adrenergic Blockers
  - Beta Blocker-Diuretic Combinations
  - Central Alph-2 Agonists-Diuretic Combinations
  - Diuretics
  - Vasodilator-Diuretic Combinations
  - Antihyperlipidemic HMG CoA Reduct Inhib & Calcium Channel Blocker Comb
  - Renin-Angiotensin-Aldosterone System (RAAS) Blocking Agent
  - Calcium Channel Blockers and Combinations

### Hyperthyroidism

Rule 0:

- Code or free-text problem on problem list

Rule 1:

- 4 or more billing codes in 242, 242.0, 242.00, 242.01, 242.1, 242.10, 242.11, 242.2, 242.20, 242.21, 242.3, 242.30, 242.31, 242.4, 242.40, 242.41, 242.8, 242.80, 242.81, 242.9, 242.90, 242.91, 244.1, 244.2, 244.3 (Hyperthyroidism)

Rule 2:

- At least one medication in:
  - 167 Antithyroid Agents

Rule 3:

- 1 or more billing code in 242, 242.0, 242.00, 242.01, 242.1, 242.10, 242.11, 242.2, 242.20, 242.21, 242.3, 242.30, 242.31, 242.4, 242.40, 242.41, 242.8, 242.80, 242.81, 242.9, 242.90, 242.91, 244.1, 244.2, 244.3 (Hyperthyroidism)
- RADIOD (radioiodine therapy) performed

### Hypothyroidism

Rule 0:

- Code or free-text problem on problem list

Rule 1:

- 2 or more billing codes in 243, 244.0, 244.1, 244.2, 244.3, 244.8, 244.9, 245.2 (Hypothyroidism)

Rule 2:

- At least one medication in:
  - Thyroid Hormones and Combinations

### Myasthenia Gravis

Rule 0:

- Code or free-text problem on problem list

Rule 1:

- 2 or more billing codes in 358.00, 358.01, 358.0 (Myasthenia gravis)

Rule 2:

- 1 or more billing code in 358.00, 358.01, 358.0 (Myasthenia gravis)
- At least one medication in:
  - Antimyasthenic Agents

### **Osteoporosis/Osteopenia**

Rule 0:

- Code or free-text problem on problem list

Rule 1:

- 2 or more billing codes in 733.0, 733.00, 733.01, 733.02, 733.03, 733.09, 733.90 (Osteoporosis)

Rule 2:

- At least one medication in:
  - Bone Resorption Inhibitors – Bisphosphonates and Combinations

Rule 3:

- NTx (urine cross-linked N-telopeptide of type I collagen) performed

Rule 4:

- Bone Formation Stimulating Agents – Parathyroid Hormone-Type

### **Renal Insufficiency, Renal Failure**

Rule 0:

- Code or free-text problem on problem list

Rule 1:

- The following procedure on the problem or procedure list:
  - Hemodialysis

Rule 2:

- 3 or more billing codes in 585, 585.1, 585.2, 585.3, 585.4, 585.5, 585.6, 585.9
- Last GFR less than or equal 45 or no GFR recorded

Rule 3:

- 3 or more GFR < 60
- Last GFR less than or equal to 45

### **Rheumatoid Arthritis**

Rule 0:

- Code or free-text problem on problem list

Rule 1:

- 3 or more billing codes in 714.0, 714.1, 714.2, 714.30, 714.31, 714.32, 714.33, V82.1 (Rheumatoid arthritis)

Rule 2:

- 1 or more billing code in 714.0, 714.1, 714.2, 714.30, 714.31, 714.32, 714.33, V82.1 (Rheumatoid arthritis)
- Max value for RHF greater than or equal to 50 (Rheumatoid factor)

Rule 3:

- 2 or more billing codes in 714.0, 714.1, 714.2, 714.30, 714.31, 714.32, 714.33, V82.1 (Rheumatoid arthritis)
- At least one medication in:
  - Disease Modifying Anti-Rheumatoid Drugs (DMARDs)
  - NSAIDs, Cyclooxygenase-2 (COX-2) Selective Inhibitors and Combinations
  - Antineoplastic - CD20 Specific Recombinant Monoclonal Antibody Agents

### **Sickle Cell**

Rule 0:

- Code or free-text problem on problem list

Rule 1:

- 2 or more billing codes in 282.6, 282.60, 282.61, 282.62, 282.63, 282.64, 282.68, 282.69 (Sickle cell)

Rule 2:

- HbS results greater than or equal to 50

### **Stroke**

Rule 0:

- Code or free-text problem on problem list

Rule 1:

- 3 or more billing codes in 433.01, 433.11, 433.21, 433.31, 433.91, 434.01, 434.11, 434.91 (stroke)

Rule 2:

- 2 or more billing codes in 433.01, 433.11, 433.21, 433.31, 433.91, 434.01, 434.11, 434.91 (stroke)
- 2 or more billing codes in 342.01, 438.11, 438.2, 438.21, 438.22, 438.3, 438.31, 438.32, 438.4, 438.41, 438.42, 438.83, 438.89, 438.9, 784.3 (effects)
